# Supplementary material for: Insights into the potential applications of permanganate/peroxymonosulfate systems: enhancement via amorphous MnO 2 , effects of water matrices, and optimization using response surface methodology
Source: Royal Society of Chemistry journal article supplement (doi:10.1039/d3ra08084f), 2024-01-01
Supplement: d3ra08084f1.pdf [file d3ra08084f1.pdf]

## Supporting Information

**Insights into the potential applications of permanganate/peroxymonosulfate systems: Enhancement by amorphous MnO<sub>2</sub>, effects of water matrices, optimization by response surface methodology**

Xin Yang<sup>a,c</sup>, Xiaoshuang Sun<sup>a</sup>, Jiang Yu<sup>a,b,c,\*</sup>, Zhi Huang<sup>a,c</sup>, Jie Yu<sup>a,c</sup>, Siwei Deng<sup>a</sup>,  
Yinying Jiang<sup>a,b</sup>, Weiwei Zhu<sup>a</sup>

*a Department of Environmental Science and Engineering, College of Architecture and Environment, Sichuan University, Chengdu, 610065, P.R China*

*bYibin Institute of Industrial Technology, Sichuan University, Yibin 644000, P.R China*

*c Institute of New Energy and Low Carbon Technology, Sichuan University, Chengdu, 610065, P.R China*

\* Corresponding author:

E-mail: [yuj@scu.edu.cn](mailto:yuj@scu.edu.cn) (Prof. Jiang Yu).

Address: Sichuan University, No. 24 South Section 1, Yihuan Road, Chengdu, China,  
610065

# Supplementary Catalogue

|                                                                                                                                           |    |
|-------------------------------------------------------------------------------------------------------------------------------------------|----|
| FIGURES.....                                                                                                                              | 1  |
| Fig. S1. The chemical structure of SMX.....                                                                                               | 1  |
| Fig. S2. Batch oxidation experiment operating procedure.....                                                                              | 1  |
| Fig. S3. Effect of bicarbonate addition on pH Changes in CUPP system degradation of SMX.....                                              | 1  |
| Fig. S4. (a)~(p): The retention time of each degradation intermediate, fragment ion and corresponding mass spectrometry of SMX.....       | 4  |
| Fig. S5. a) Residual distribution map; b) The degree to which the predicted value of the response value is close to the actual value..... | 5  |
| Fig. S6. Contribution of each influence factor to response (Pareto chart).....                                                            | 5  |
| TABLES.....                                                                                                                               | 6  |
| Table S1. List of materials and reagents.....                                                                                             | 6  |
| Table S2. Results of Full-scale Analysis on Background Indicators of Natural Groundwater Body.....                                        | 7  |
| Table S3. Indirect identification of free radicals: Relationship between Kobs and inhibition rate.....                                    | 8  |
| Table S4. Details of SMX degradation intermediates and fragments (HPLC/MS).....                                                           | 9  |
| Table S5. Kinetic parameters of SMX degradation in CUPP system with Cl <sup>-</sup> , HCO <sub>3</sub> <sup>-</sup> , HA added.....       | 11 |
| Table S6. Response surface experimental design scheme and response value.....                                                             | 12 |
| Table S7. Response surface model ANOVA results.....                                                                                       | 13 |
| Table S8. Regression model fitting results.....                                                                                           | 14 |
| TEXTS.....                                                                                                                                | 15 |
| Text S1. Sample testing methods.....                                                                                                      | 15 |
| FORMULAS.....                                                                                                                             | 16 |
| (S1).....                                                                                                                                 | 16 |
| (S2).....                                                                                                                                 | 16 |
| (S3).....                                                                                                                                 | 16 |
| (S4).....                                                                                                                                 | 16 |
| (S5).....                                                                                                                                 | 16 |
| (S6).....                                                                                                                                 | 16 |
| (S7).....                                                                                                                                 | 16 |



# FIGURES

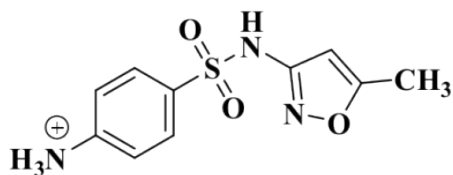

Fig. S1. The chemical structure of SMX ( $m/z=254$ )

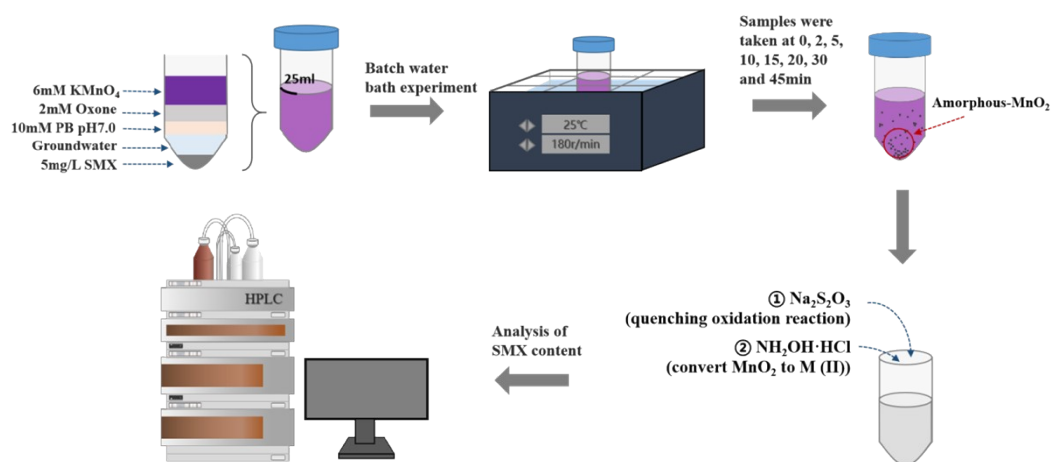

Fig. S2. Batch oxidation experiment operating procedure

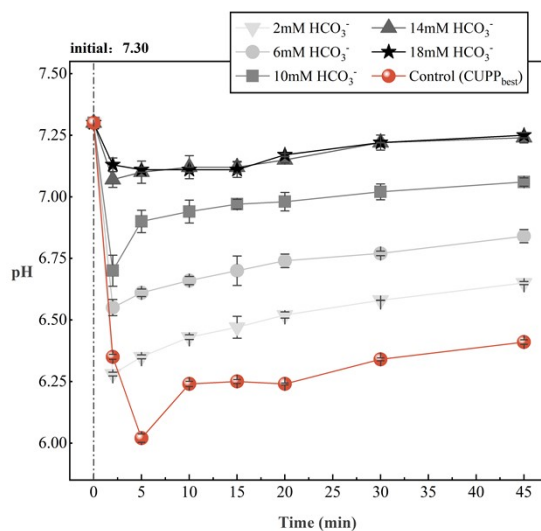

Fig. S3. Effect of bicarbonate addition on pH Changes in CUPP system degradation of SMX

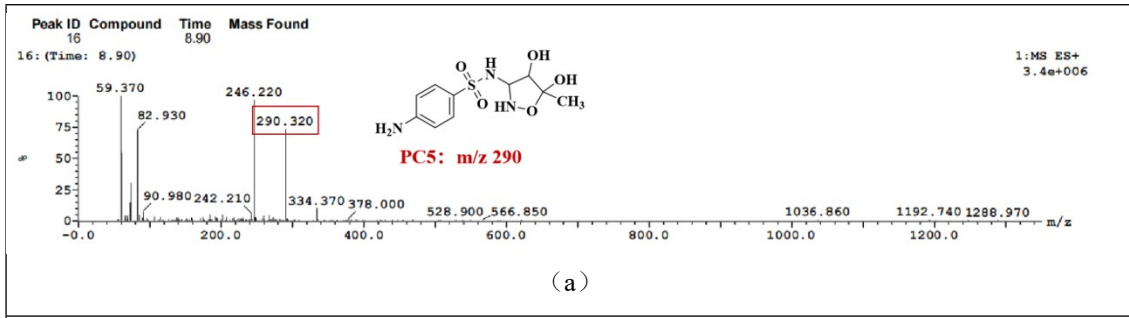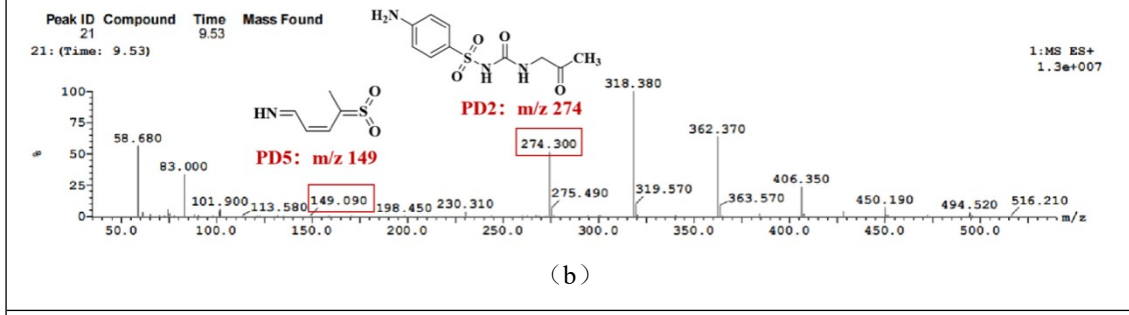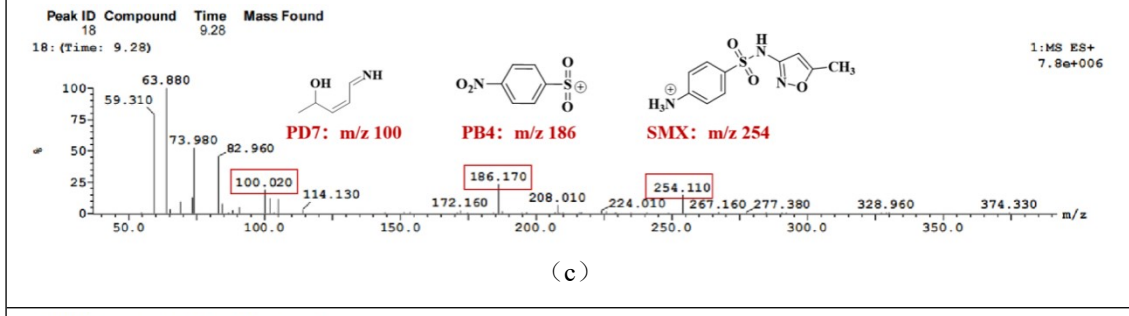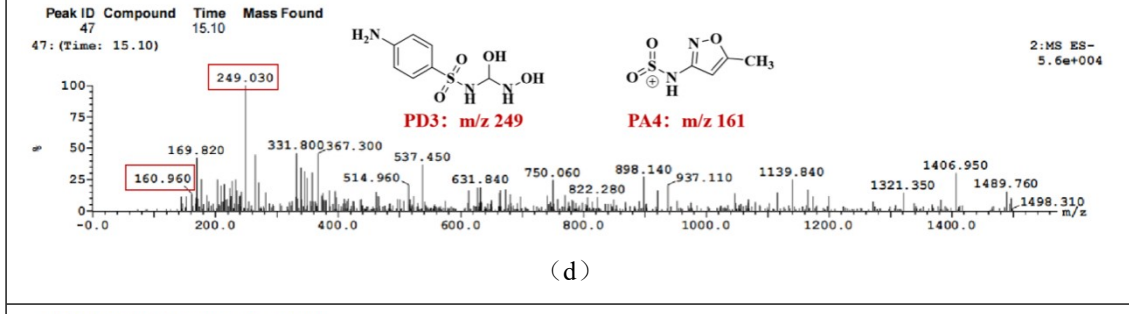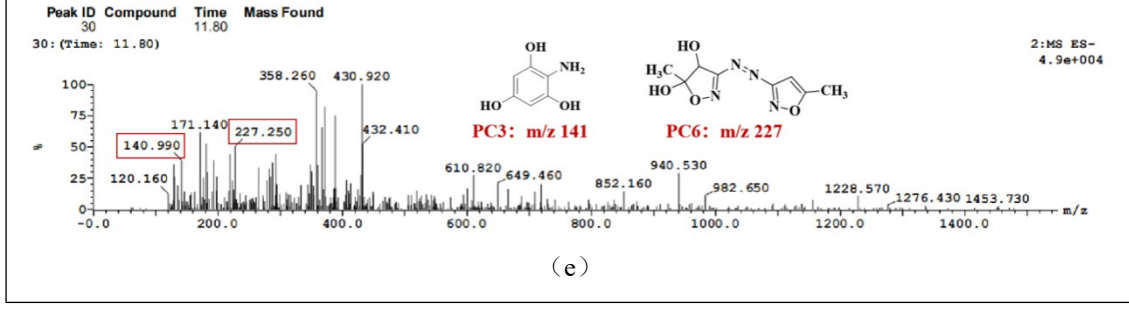

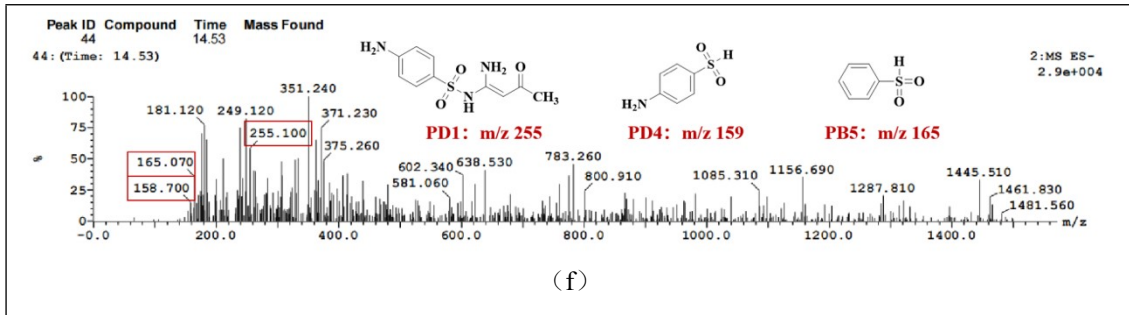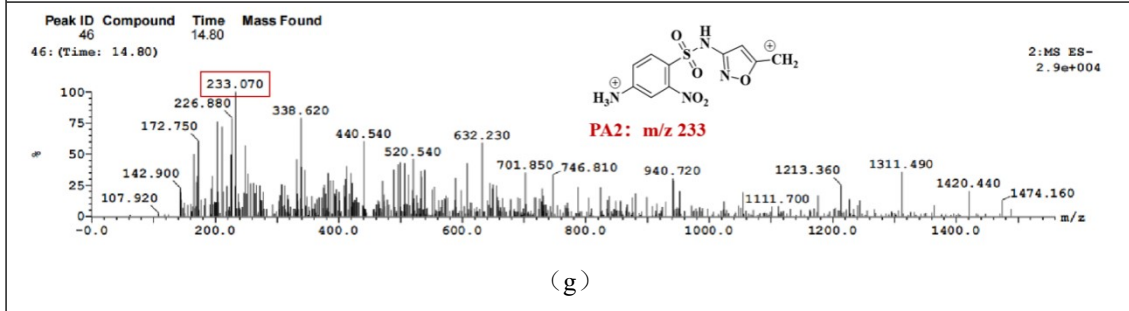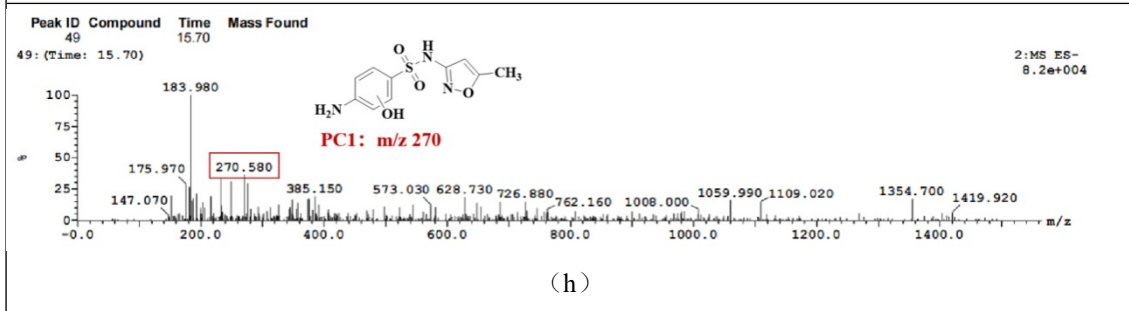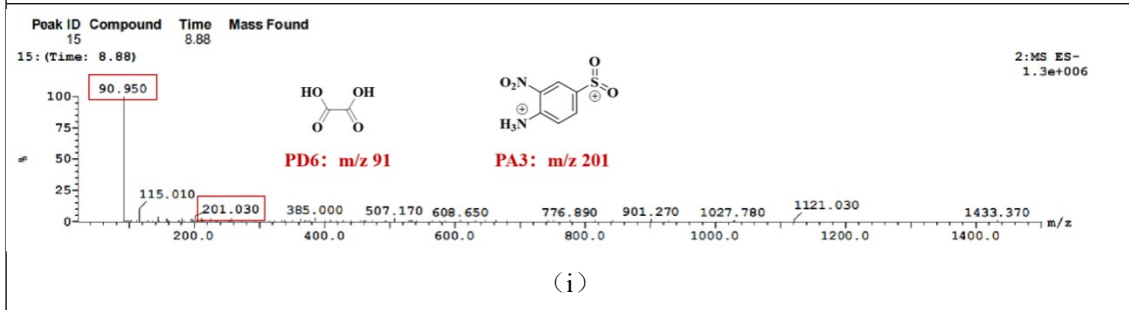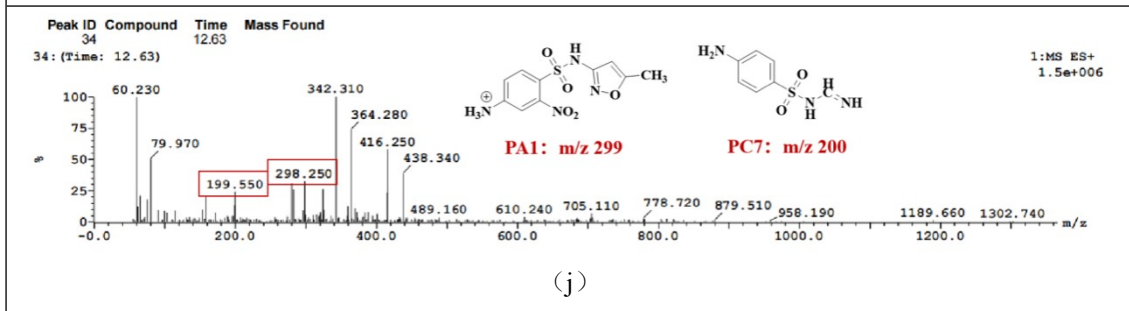

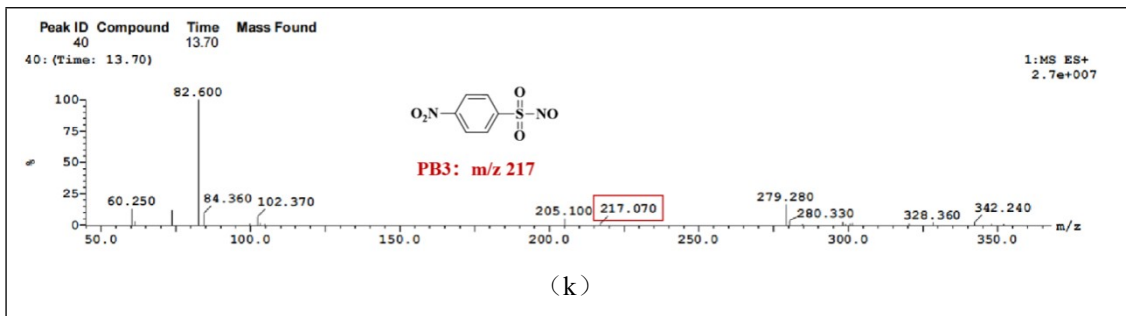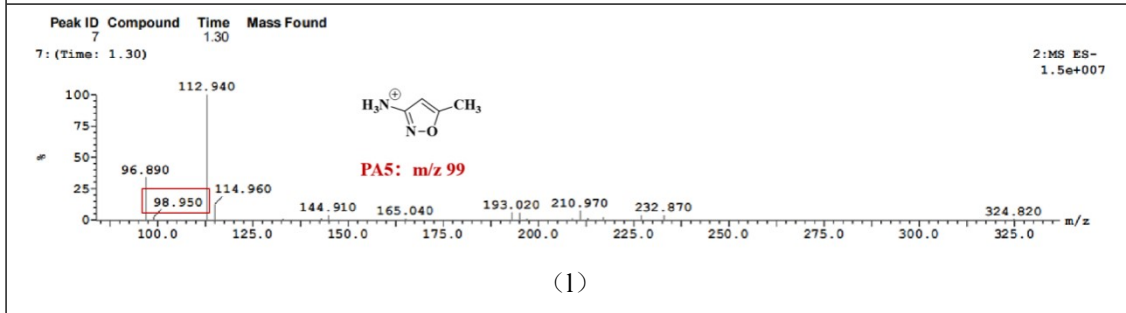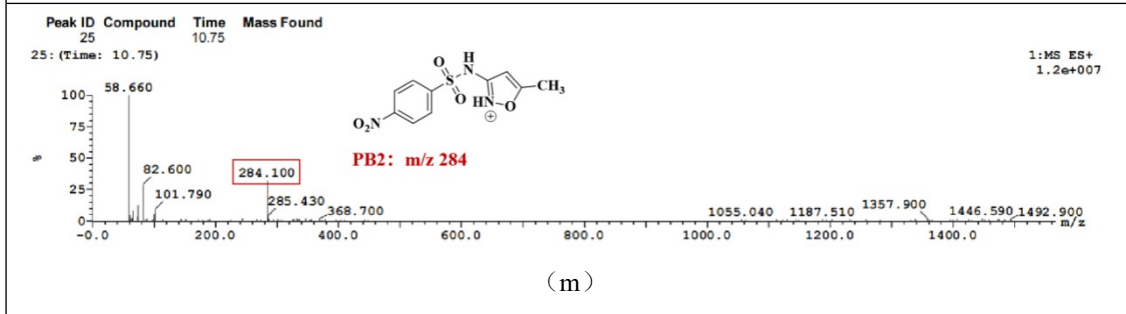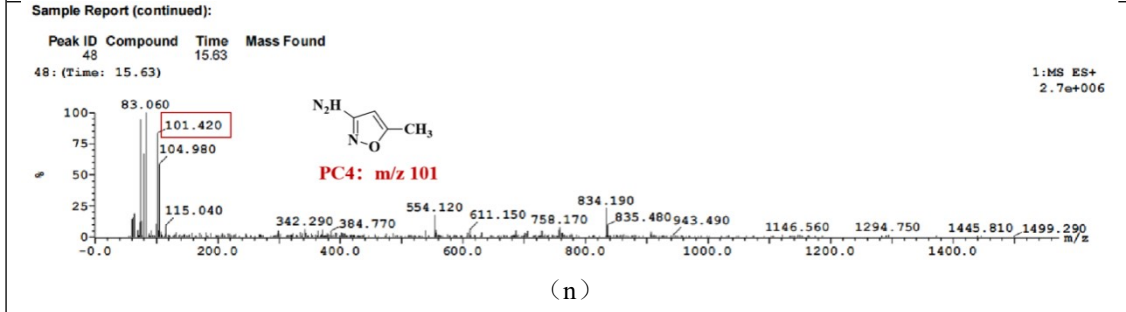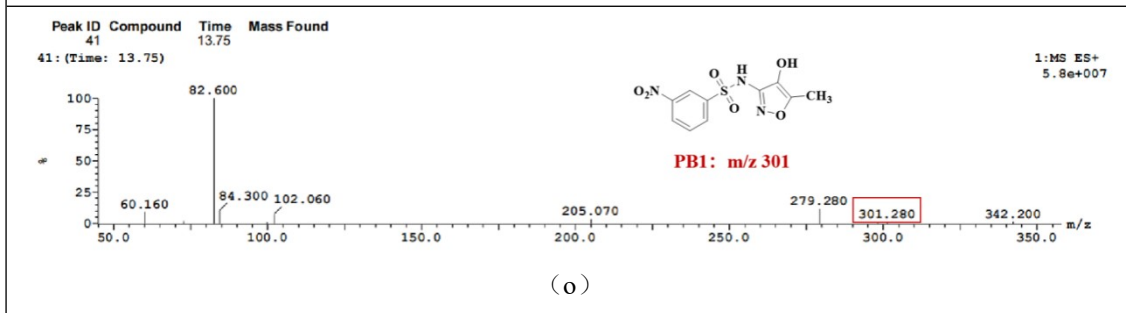

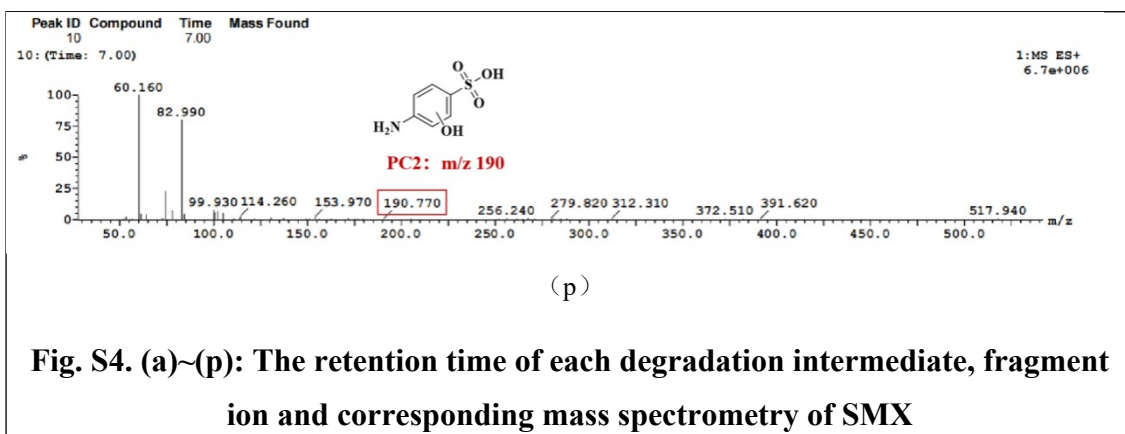



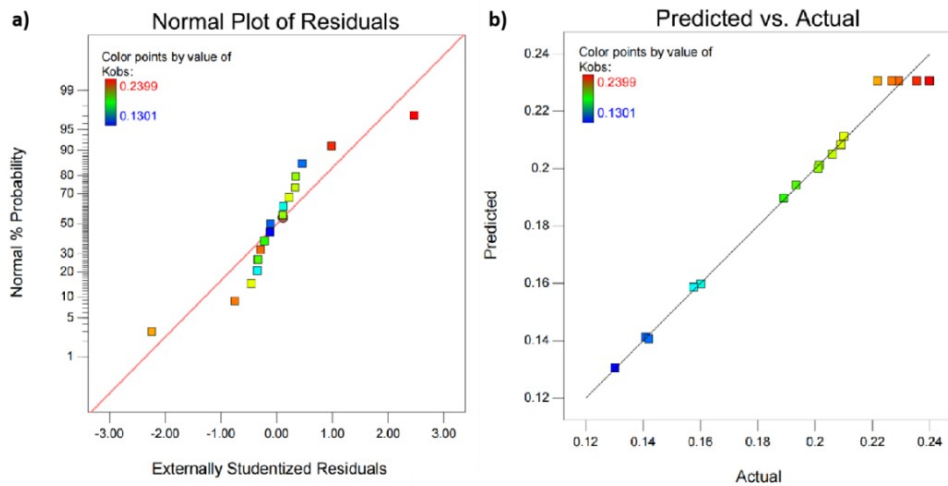

**Fig. S5. a) Residual distribution map; b) The degree to which the predicted value of the response value is close to the actual value**

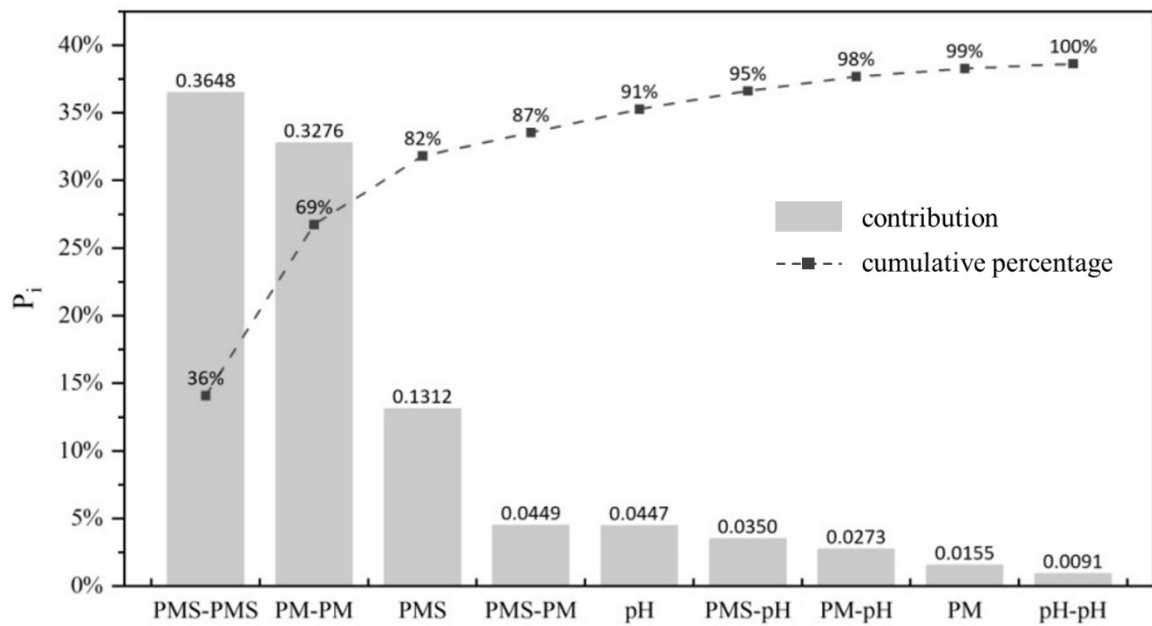

(Note:  $P_i$  represents the contribution value of each factors)

**Fig. S6. Contribution of each influence factor to response (Pareto chart)**

# TABLES

**Table S1. List of materials and reagents**

| Reagent name                 | Chemical formula                          | Purity      | Company                                                   |
|------------------------------|-------------------------------------------|-------------|-----------------------------------------------------------|
| Sulfonamethoxazole (SMX)     | $C_{10}H_{11}N_3O_3S$                     | $\geq 98\%$ | PTSRTI                                                    |
| Permanganate                 | $KMnO_4$                                  | AR          |                                                           |
| Peroxymonosulfate (Oxone)    | $KHSO_5 \cdot 0.5KHSO_4 \cdot 0.5K_2SO_4$ | $\geq 42\%$ |                                                           |
| Sodium Carbonate             | $Na_2CO_3$                                | AR          |                                                           |
| Sodium Bicarbonate           | $NaHCO_3$                                 | AR          | CHENGDU SHUDU                                             |
| Hyposulphite                 | $Na_2S_2O_3$                              | AR          | Chemical Reagent                                          |
| Potassium Sulphate           | $K_2SO_4$                                 | GR          |                                                           |
| Potassium Nitrate            | $KNO_3$                                   | AR          |                                                           |
| L-tryptophan                 | $C_{11}H_{12}N_2O_2$                      | AR          |                                                           |
| tert-Butyl Alcohol (TBA)     | $C_4H_9OH$                                | AR          | Chengdu Kelong Chemical Co., Ltd                          |
| Sodium Hydroxide             | $NaOH$                                    | AR          |                                                           |
| Ethanol Absolute (EtOH)      | $C_2H_6O$                                 | AR          | Chengdu Jinshan Chemical Reagent Co., Ltd                 |
| Hydroxylamine Hydrochloride  | $HONH_3Cl$                                | AR          |                                                           |
| Trichloromethane             | $CHCl_3$                                  | AR          | Xilong Chemical Co., Ltd                                  |
| Natural Organic Matter (NOM) | Humic Acid (HA)                           | AR          | Tianjin kwangfu Fine Chemical Industry Research Institute |
| Methanol                     | $CH_4O$                                   | HPLC        | Hubei Futon Science and Technology Co., Ltd               |
| Acetonitrile                 | $CH_3CN$                                  | HPLC        | CINC High Purity Solvents Co., Ltd                        |

**Table S2. Results of Full-scale Analysis on Background Indicators of Natural Groundwater Body**

| Index                       | pH   | NTU | TH<br>(mg/L) | Alkalinity<br>(mg/L) | TDS<br>(mg/L) | Sulfate<br>(mg/L) | Nitrate<br>(mg/L) | Chlorides<br>(mg/L) | Ammonia<br>nitrogen<br>(g/L) | UV254<br>cm-1 | TOC<br>(mg/L) |
|-----------------------------|------|-----|--------------|----------------------|---------------|-------------------|-------------------|---------------------|------------------------------|---------------|---------------|
| <b>Actual<br/>measure</b>   | 7.92 | 0.8 | 288          | 285                  | 490           | 185               | 0.023             | 49.4                | 0.10                         | 0.007         | 1.6615        |
| <b>Quality<br/>standard</b> | I    | I   | II           | -                    | II            | I                 | I                 | I                   | II                           | -             | -             |

ps. TH: Total Hardness, TDS: Total dissolved solids; The Quality standard is based on groundwater specification (GBT14848-2017)

**Table S3. Indirect identification of free radicals: Relationship between  $K_{obs}$  and inhibition rate**

| MeOH/TBA/CHCl <sub>3</sub> : PMS |                                |        |                   |                      |        |                   |
|----------------------------------|--------------------------------|--------|-------------------|----------------------|--------|-------------------|
| (Molar ratio)                    | $K_{obs}$ (min <sup>-1</sup> ) |        |                   | Inhibition ratio (%) |        |                   |
|                                  | MeOH                           | TBA    | CHCl <sub>3</sub> | MeOH                 | TBA    | CHCl <sub>3</sub> |
| Control (CUPP <sub>best</sub> )  |                                | 0.2291 |                   | -                    | -      | -                 |
| 50:1                             | 0.1138                         | 0.1124 | 0.1318            | 50.34%               | 50.94% | 42.48%            |
| 100:1                            | 0.1031                         | 0.0963 | 0.1349            | 54.98%               | 57.96% | 41.12%            |
| 200:1                            | 0.0979                         | 0.0671 | 0.1344            | 57.26%               | 70.71% | 41.34%            |

**Table S4. Details of SMX degradation intermediates and fragments (HPLC/MS)**

| No. | Product number | Molecular formula                                               | Molecular structure | Mass-charge ratio (m/z) | Retention time (min) |
|-----|----------------|-----------------------------------------------------------------|---------------------|-------------------------|----------------------|
| 1   | SMX            | C <sub>10</sub> H <sub>12</sub> O <sub>3</sub> N <sub>3</sub> S |                     | 254                     | 9.28                 |
| 2   | PA1            | C <sub>10</sub> H <sub>11</sub> O <sub>5</sub> N <sub>4</sub> S |                     | 299                     | 12.63                |
| 3   | PA2            | C <sub>10</sub> H <sub>9</sub> O <sub>3</sub> N <sub>4</sub>    |                     | 233                     | 14.80                |
| 4   | PA3            | C <sub>6</sub> H <sub>5</sub> O <sub>4</sub> N <sub>2</sub> S   |                     | 201                     | 8.88                 |
| 5   | PA4            | C <sub>4</sub> H <sub>5</sub> O <sub>3</sub> N <sub>2</sub> S   |                     | 161                     | 15.10                |
| 6   | PA5            | C <sub>4</sub> H <sub>7</sub> ON <sub>2</sub>                   |                     | 99                      | 1.30                 |
| 7   | PB1            | C <sub>9</sub> H <sub>9</sub> O <sub>6</sub> N <sub>3</sub> S   |                     | 301                     | 13.75                |
| 8   | PB2            | C <sub>10</sub> H <sub>10</sub> O <sub>5</sub> N <sub>3</sub> S |                     | 284                     | 10.75                |
| 9   | PB3            | C <sub>6</sub> H <sub>4</sub> O <sub>4</sub> N <sub>2</sub> S   |                     | 217                     | 13.70                |
| 10  | PB4            | C <sub>6</sub> H <sub>4</sub> O <sub>3</sub> NS                 |                     | 186                     | 9.28                 |
| 11  | PB5            | C <sub>6</sub> H <sub>6</sub> O <sub>2</sub> S                  |                     | 165                     | 14.53                |
| 12  | PC1            | C <sub>10</sub> H <sub>11</sub> O <sub>4</sub> N <sub>3</sub> S |                     | 270                     | 15.70                |

|    |     |                       |                                                                                     |     |       |
|----|-----|-----------------------|-------------------------------------------------------------------------------------|-----|-------|
| 13 | PC2 | $C_6H_8O_4S$          | 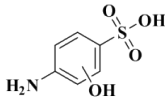   | 190 | 7.00  |
| 14 | PC3 | $C_6H_7O_3N$          |    | 141 | 11.80 |
| 15 | PC4 | $C_4H_6ON_2$          |    | 101 | 15.63 |
| 16 | PC5 | $C_{10}H_{15}N_3SO_5$ |    | 290 | 8.90  |
| 17 | PC6 | $C_8H_{10}O_4N_4$     |    | 227 | 11.80 |
| 18 | PD1 | $C_{10}H_{11}O_3N_3S$ |    | 255 | 14.53 |
| 19 | PD2 | $C_{10}H_{13}O_4N_3S$ |   | 274 | 9.53  |
| 20 | PD3 | $C_7H_{10}O_4N_3S$    |  | 249 | 15.10 |
| 21 | PD4 | $C_7H_9O_2N_3S$       |  | 200 | 12.63 |
| 22 | PD5 | $C_6H_7O_2NS$         |  | 159 | 14.53 |
| 23 | PD6 | $C_3H_7O_2NS$         |  | 149 | 9.53  |
| 24 | PD7 | $C_5H_9ON$            |  | 100 | 9.28  |

(ps: The product numbers A, B, C, etc. represent the different degradation paths, while the Arabic numerals represent the intermediates and fragment ions within each degradation path.)

**Table S5. Kinetic parameters of SMX degradation in CUPP system with Cl<sup>-</sup>, HCO<sub>3</sub><sup>-</sup>, HA added**

| Added substances                   | Concentration | K <sub>obs</sub> (min <sup>-1</sup> ) | Kinetic equation                       | t <sub>1/2</sub> (min) | R <sup>2</sup> |
|------------------------------------|---------------|---------------------------------------|----------------------------------------|------------------------|----------------|
| Control                            | 0             | 0.2219                                | y=-0.142x-0.475                        | 4.36                   | 0.954          |
|                                    | 1             | 0.1470                                | y=-0.147x-0.199                        | 5.58                   | 0.945          |
|                                    | 3             | 0.2110                                | y=-0.211x-0.075                        | 3.81                   | 0.968          |
| Cl <sup>-</sup> (mM)               | 5             | 0.2810                                | y=-0.281x-0.030                        | 2.69                   | 0.985          |
|                                    | 7             | 0.2770                                | y=-0.277x-0.213                        | 2.62                   | 0.924          |
|                                    | 9             | 0.3710                                | y=-0.371x-0.017                        | 2.53                   | 0.998          |
| HCO <sub>3</sub> <sup>-</sup> (mM) | 2             | 0.1748                                | y=0.143+4.723e <sup>^</sup> (-x/5.721) | 5.72                   | 0.996          |
|                                    | 6             | 0.1652                                | y=0.153+4.704e <sup>^</sup> (-x/6.054) | 6.05                   | 0.996          |
|                                    | 10            | 0.1693                                | y=0.162+4.702e <sup>^</sup> (-x/5.905) | 5.91                   | 0.996          |
|                                    | 14            | 0.1640                                | y=0.100+4.818e <sup>^</sup> (-x/6.098) | 6.10                   | 0.999          |
|                                    | 18            | 0.1710                                | y=0.125+4.756e <sup>^</sup> (-x/5.848) | 5.85                   | 0.998          |
|                                    | 50            | 0.1689                                | y=0.117+4.728e <sup>^</sup> (-x/5.919) | 5.92                   | 0.995          |
| HA (mg/L)                          | 100           | 0.1748                                | y=0.124+4.725e <sup>^</sup> (-x/5.722) | 5.72                   | 0.995          |
|                                    | 150           | 0.1703                                | y=0.086+4.718e <sup>^</sup> (-x/5.873) | 5.87                   | 0.994          |
|                                    | 200           | 0.1667                                | y=0.097+4.710e <sup>^</sup> (-x/6.000) | 6.00                   | 0.992          |
|                                    | 250           | 0.1943                                | y=0.149+4.637e <sup>^</sup> (-x/5.147) | 5.15                   | 0.986          |

**Table S6. Response surface experimental design scheme and response value**

| Standard order | Run sequence | PMS (mM) | PM (mM) | pH | K <sub>obs</sub> (min <sup>-1</sup> ) |
|----------------|--------------|----------|---------|----|---------------------------------------|
| 6              | 1            | 8        | 2       | 5  | 0.2090                                |
| 7              | 2            | 4        | 2       | 9  | 0.1891                                |
| 17             | 3            | 6        | 2       | 7  | 0.2355                                |
| 4              | 4            | 8        | 2.4     | 7  | 0.2015                                |
| 10             | 5            | 6        | 2.4     | 5  | 0.1933                                |
| 16             | 6            | 6        | 2       | 7  | 0.2399                                |
| 11             | 7            | 6        | 1.6     | 9  | 0.2060                                |
| 14             | 8            | 6        | 2       | 7  | 0.2268                                |
| 1              | 9            | 4        | 1.6     | 7  | 0.1409                                |
| 3              | 10           | 4        | 2.4     | 7  | 0.1301                                |
| 9              | 11           | 6        | 1.6     | 5  | 0.1576                                |
| 15             | 12           | 6        | 2       | 7  | 0.2218                                |
| 8              | 13           | 8        | 2       | 9  | 0.2100                                |
| 5              | 14           | 4        | 2       | 5  | 0.1420                                |
| 13             | 15           | 6        | 2       | 7  | 0.2291                                |
| 2              | 16           | 8        | 1.6     | 7  | 0.1601                                |
| 12             | 17           | 6        | 2.4     | 9  | 0.2010                                |



**Table S7. Response surface model ANOVA results**

| Source          | Quadratic sum | Degree of Freedom | Mean sum of square | F-value | P-value (Prob >F) |
|-----------------|---------------|-------------------|--------------------|---------|-------------------|
| Model           | 0.02          | 9                 | 2.17E-03           | 71.14   | <0.0001**         |
| Residual error  | 2.14E-04      | 7                 | 3.05E-05           |         |                   |
| Loss of fit     | 8.91E-06      | 3                 | 2.97E-06           | 0.058   | 0.9792            |
| Pure error      | 2.05E-04      | 4                 | 5.12E-05           |         |                   |
| Total deviation | 0.02          | 16                |                    |         |                   |

**Table S8. Regression model fitting results**

| Statistical data                        | Abbreviation                  | Value    |
|-----------------------------------------|-------------------------------|----------|
| Standard deviation                      | Std.Dev.                      | 0.005523 |
| Mean value                              | Mean                          | 0.19     |
| Variable coefficient                    | C.V.%                         | 2.85     |
| Determination coefficient               | R <sup>2</sup>                | 0.9892   |
| Correction coefficient of determination | R <sup>2</sup> <sub>Adj</sub> | 0.9753   |
| Adeq Precision                          | Adeq Precision                | 23.647   |

**Table S9. Degradation efficiency of the CUPP system**

| PMS concentration | PM concentration | Pollutant and concentration               | removal efficiency | reference |
|-------------------|------------------|-------------------------------------------|--------------------|-----------|
| 2.4mM             | 1.8mM            | aqueous mixture of 0.3 mM benzene and TCE | >85%               | 22        |
| 3.9mM             | 5.8mM            | 50mg/L acid orange 7                      | 89.5%              | 28        |
| 4mM               | 2mM              | 100uM p-chlorobenzoic acid                | >98%               | 29        |
| 6mM               | 2mM              | 5mg/L SMX                                 | ≈100%              | the study |

# TEXTS

## Text S1. Sample testing methods

### a. pH Detection:

The pH meter should undergo daily calibration, employing a two-point calibration approach with buffer solutions of pH 4.00 and 9.18. When in use, the pH meter probe is immersed in the reaction solution, ensuring that the liquid level remains below the height of the electrolyte within the electrode. To ensure accurate readings, a stable measurement for at least 15 seconds is required, confirming the recorded data as the pH value of the solution.

### b. SMX Content Determination (HPLC):

The alteration in SMX concentration was assessed using HPLC. The HPLC system was equipped with a Sapphiresil C18 column (150 mm × 4.6 mm, 5 μm, Follie) and a UV-visible light detector set at a wavelength of 264 nm. The analysis employed a mobile phase consisting of 0.1% acetic acid water (60%) as Mobile Phase A and acetonitrile (40%) as Mobile Phase B, with a flow rate of 1 mL/min. The column temperature was maintained at 30 °C, and an injection volume of 50 μL was used. The retention time was observed at 6.5 min.

### c. Analysis of SMX Degradation Intermediates (HPLC/MS):

The degradation intermediates of SMX in the CUPP system were analyzed using the Waters E2695 Alliance HPLC coupled with the Waters ZQ2000 single quadrupole MS. The following detection conditions were utilized: a Water 2695 C18 chromatographic column (250 × 4.6 mm, 3 μm) was employed, with mobile phase A containing 0.1% ammonium formate and mobile phase B consisting of acetonitrile. The flow rate was set at 0.2 mL/min, and the injection volume was 20 nL. The analysis was conducted using the electrospray ionization (ESI) ion source, operating in the positive ion mode. The specific elution mode parameters can be found in the table below:

| Gradient sequence | Total time | Velocity of flow (mL/min) | A phase (%) | B phase (%) |
|-------------------|------------|---------------------------|-------------|-------------|
| 1                 | 0.1        | 0.2                       | 90          | 10          |
| 2                 | 10         | 0.2                       | 40          | 60          |
| 3                 | 17         | 0.2                       | 40          | 60          |
| 4                 | 17.1       | 0.2                       | 90          | 10          |
| 5                 | 24         | 0.2                       | 90          | 10          |

### d. Surface Morphology Analysis of AMO:

The external morphology and chemical composition of the sample were examined using the Apreo 2 scanning electron microscope (SEM) with an accompanying energy dispersion spectrometer (EDS). Prior to observation, the sample was coated with a thin layer of gold.

## FORMULAS

|  |                                                                                                       |      |
|--|-------------------------------------------------------------------------------------------------------|------|
|  | $SO_4^- \cdot + TBA \rightarrow \text{product } k = 4.0 \times 10^5 L \cdot \text{mol} \cdot s^{-1}$  | (S1) |
|  | $SO_4^- \cdot + MeOH \rightarrow \text{product } k = 1.1 \times 10^7 L \cdot \text{mol} \cdot s^{-1}$ | (S2) |
|  | $\cdot OH + TBA \rightarrow \text{product } k = 6.0 \times 10^8 L \cdot \text{mol} \cdot s^{-1}$      | (S3) |
|  | $\cdot OH + MeOH \rightarrow \text{product } k = 9.7 \times 10^8 L \cdot \text{mol} \cdot s^{-1}$     | (S4) |
|  | $\cdot OH + MeOH \rightarrow \text{product } k = 9.7 \times 10^8 L \cdot \text{mol} \cdot s^{-1}$     | (S5) |
|  | $NH_2Cl + HOCl \rightarrow NHCl_2 + H_2O$                                                             | (S6) |
|  | $NHCl_2 + HOCl \rightarrow NCl_3 + H_2O$                                                              | (S7) |
